# Supplementary material
Source: publisher site journal article supplement (https://www.dovepress.com/article/602215)
Supplement: Supplementary file 1 [file 602215%20Supplementary%20Material.docx]

Supplementary Material


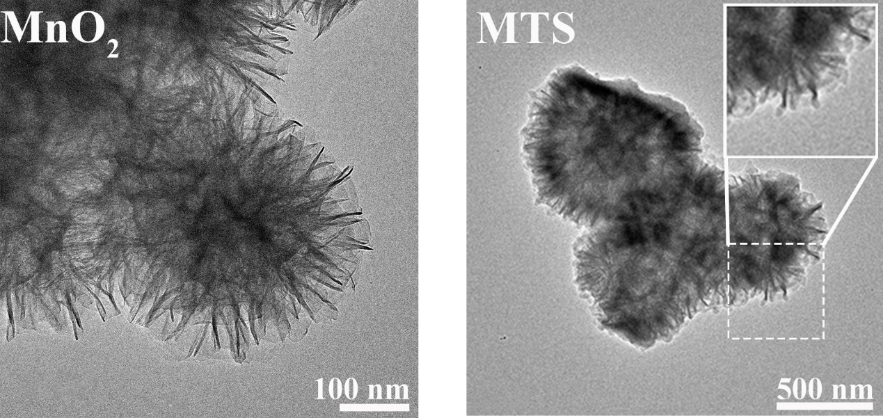


Figure S1. TEM image of MnO2 and MTS.


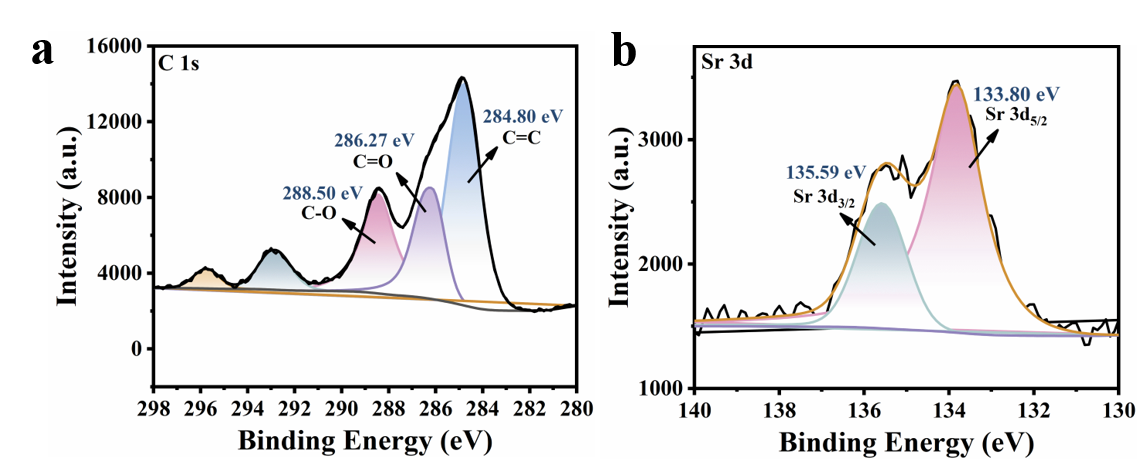


Figure S2. The XPS detailed spectrum of MTS: (a) C 1s, (b) Sr 3d.





Figure S3. Standard curve of TA in deionized water.





Figure S4. Standard curve of BCA protein.





Figure S5. Standard curve of TA in a mixed solvent of 0.1 M ascorbic acid and 0.1 M HCl.


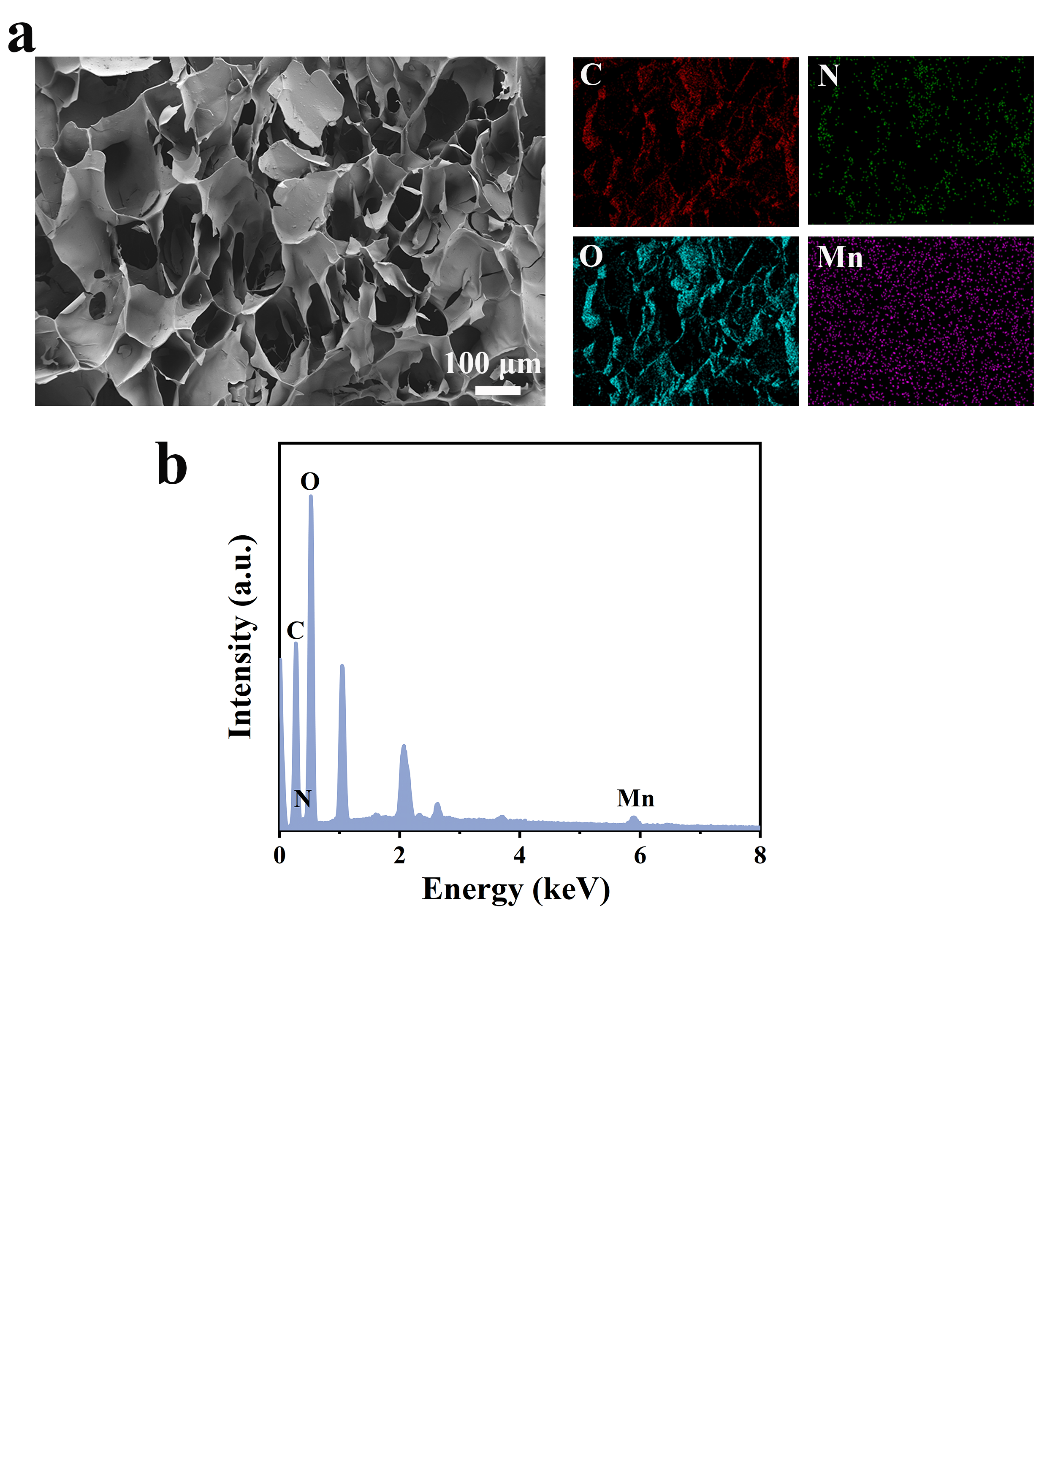


Figure S6. (a) The SEM image of MTS@QP-G@CO, as well as the distribution maps of C, N, O, and Mn elements and (b) EDS spectra.





Figure S7. The mass degradation ratios of MTS@QP-G@CO in PBS (pH 7.4) were measured over a period of 14 days.


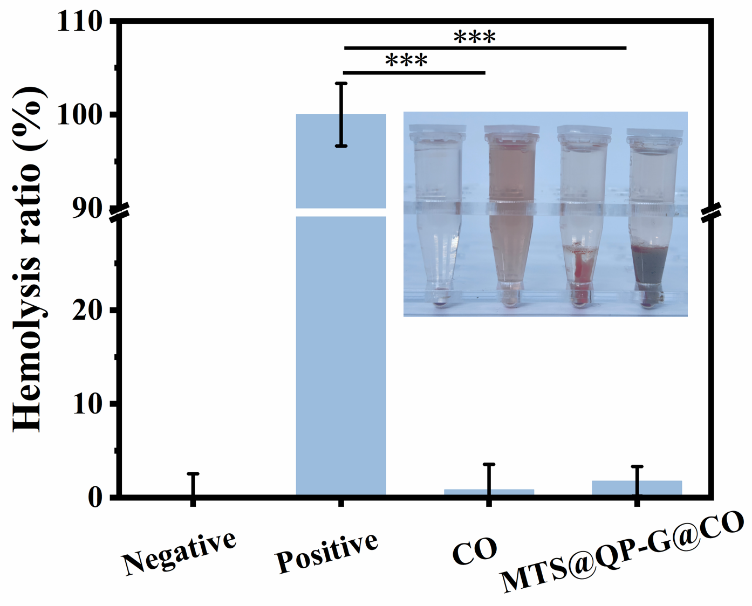


Figure S8. Hemolysis ratios of CO and MTS@QP-G@CO hydrogels. Significance levels of ****p*<0.001 were applied.

| Gene | Forward (5’-3’) | Reverse (5’-3’) |
| --- | --- | --- |
| Runx2 | AGTGATTTAGGGCGCATTCC | TCTGCCTGGGATCTGTAATCTG |
| OSX | GGATGGCGTCCTCTCTGCTTGAG | AGGGAGCTGGGTAGGCGTCC |
| OCN | CCTCACACTCCTCGCCCTAT | TTCACTACCTCGCTGCCCTC |
| GAPDH | TGCGATGGGTGTGAACCACGAGAA | GAGCCCTTCCACAATGCCAAAGTT |

Table S1 List of primers
